# Supplementary material for: Magnetically controlled reversible shape-morphing microrobots with real-time X-ray imaging for stomach cancer applications
Source: Royal Society of Chemistry journal article supplement (doi:10.1039/d2tb00760f), 2022-01-01
Supplement: d2tb00760f6.pdf [file d2tb00760f6.pdf]

## Supporting Information

### **Magnetically Controlled Reversible Shape-morphing Microrobots with Real-time X-ray Imaging for Stomach Cancer Applications**

Bobby Aditya Darmawan<sup>a,b,†</sup>, Dohoon Gong<sup>b,†</sup>, Hyeon Gyu Park<sup>b</sup>, Songah Jeong<sup>c</sup>, Gwangjun Go<sup>a,b</sup>, Seokjae Kim<sup>a,b</sup>, Kim Tien Nguyen<sup>a</sup>, Shirong Zheng<sup>a,b</sup>, Minghui Nan<sup>a,b</sup>, Van Du Nguyen<sup>a,b</sup>, Doyeon Bang<sup>a,d</sup>, Chang-Sei Kim<sup>a,b</sup>, Hyungwoo Kim<sup>c,\*</sup>, Jong-Oh Park<sup>a,b,\*</sup> and Eunpyo Choi<sup>a,b,\*</sup>

<sup>a</sup>Korea Institute of Medical Microrobotics, 43-26, Cheomdangwagi-ro 208 beon-gil, Buk-gu, Gwangju 61011, Korea

<sup>b</sup>School of Mechanical Engineering, Chonnam National University, 77 Yong-bong-ro, Buk-gu, Gwangju 61186, Korea

<sup>c</sup>School of Polymer Science and Engineering, Chonnam National University, 77 Yongbong-ro, Buk-gu, Gwangju 61186, Korea

<sup>d</sup>College of AI Convergence, Chonnam National University, 77 Yong-bong-ro, Buk-gu, Gwangju 61186, Korea

†These authors contributed equally.

\*Correspondence to kimhw@jnu.ac.kr (H.K.); jop@kimiro.re.kr (J.O.P.); eunpyochoi@jnu.ac.kr (E.C.)

## Supplementary Materials

Table S1. Design parameters of the EMA system.

Figure S1.  $^1\text{H}$  NMR spectrum of mTIB.

Figure S2. The optical system used for microrobot fabrication.

Figure S3. Illustration of the chamber, which was fabricated using a three-dimensional printer.

Figure S4. Digital photographs of each material at different pH values (a) Composite resin (b) pHEMA.

Figure S5. Digital photographs of microrobot locomotion in a stomach-like channel.

Movie S1. Shape-morphing under different pH solution in petri dish (scale bar: 4 mm).

Movie S2. Locomotion performance under EMA system in 3D-printed stomach mimicked channel (scale bar: 4 mm).

Movie S3. Locomotion performance under EMA system in pig's stomach (scale bar: 4 mm).

Movie S4. Shape-morphing with pH solution manipulation in pig's stomach (scale bar: 4 mm).

Movie S5. X-ray imaging which integrated with EMA system in pig's stomach (scale bar: 2 mm)

**Table S1. Design parameters of the EMA system.**

| <b>Parameter</b>                                                | <b>Value</b> |
|-----------------------------------------------------------------|--------------|
| Workspace diameter (mm)                                         | 40           |
| Distance from end of the coil to the center of a workspace (mm) | 60           |
| Wire diameter (mm)                                              | 1.6          |
| Number of turns                                                 | 1368         |
| Coil inner diameter (mm)                                        | 40           |
| Coil outer diameter (mm)                                        | 77           |
| Coil length (mm)                                                | 210          |
| Core diameter (mm)                                              | 40           |
| Core length (mm)                                                | 240          |
| Resistance ( $\Omega$ )                                         | 2.2          |

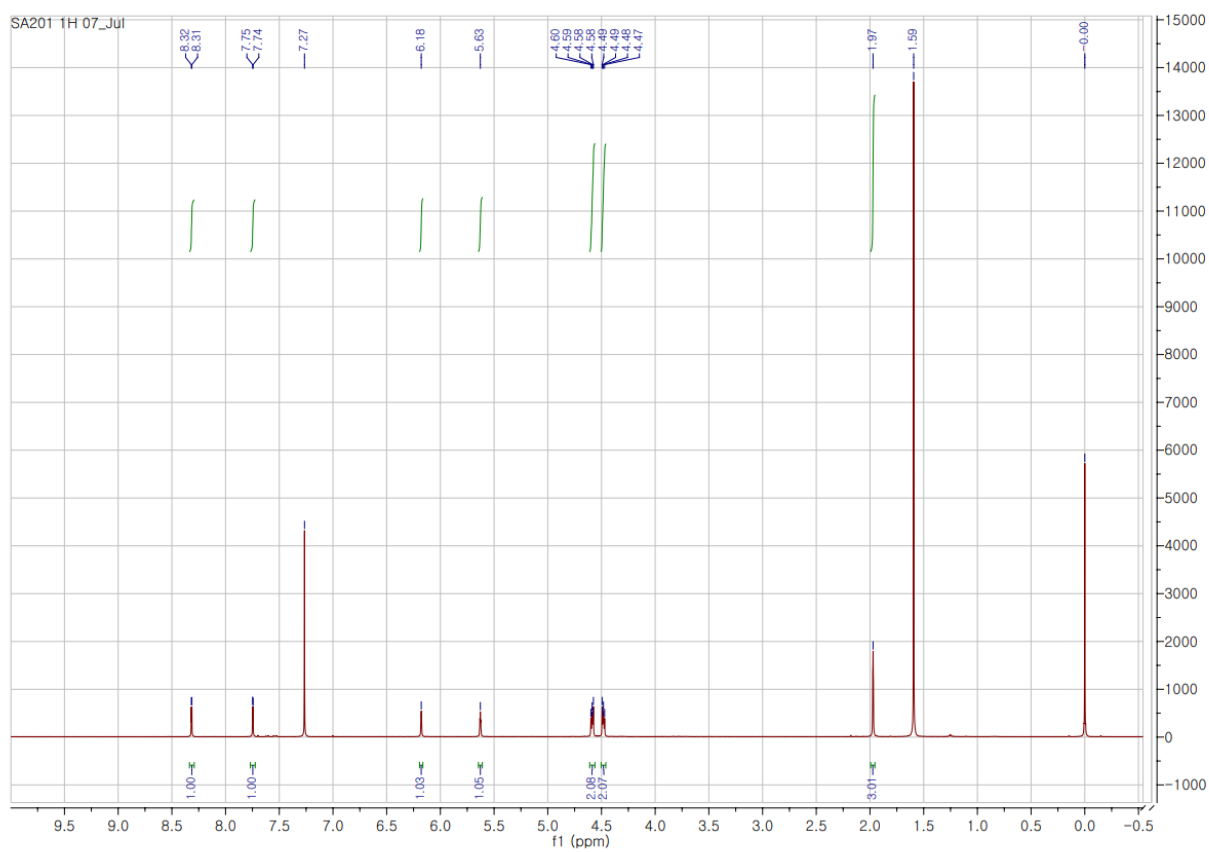

**Fig. S1.**  $^1\text{H}$  NMR spectrum of mTIB.

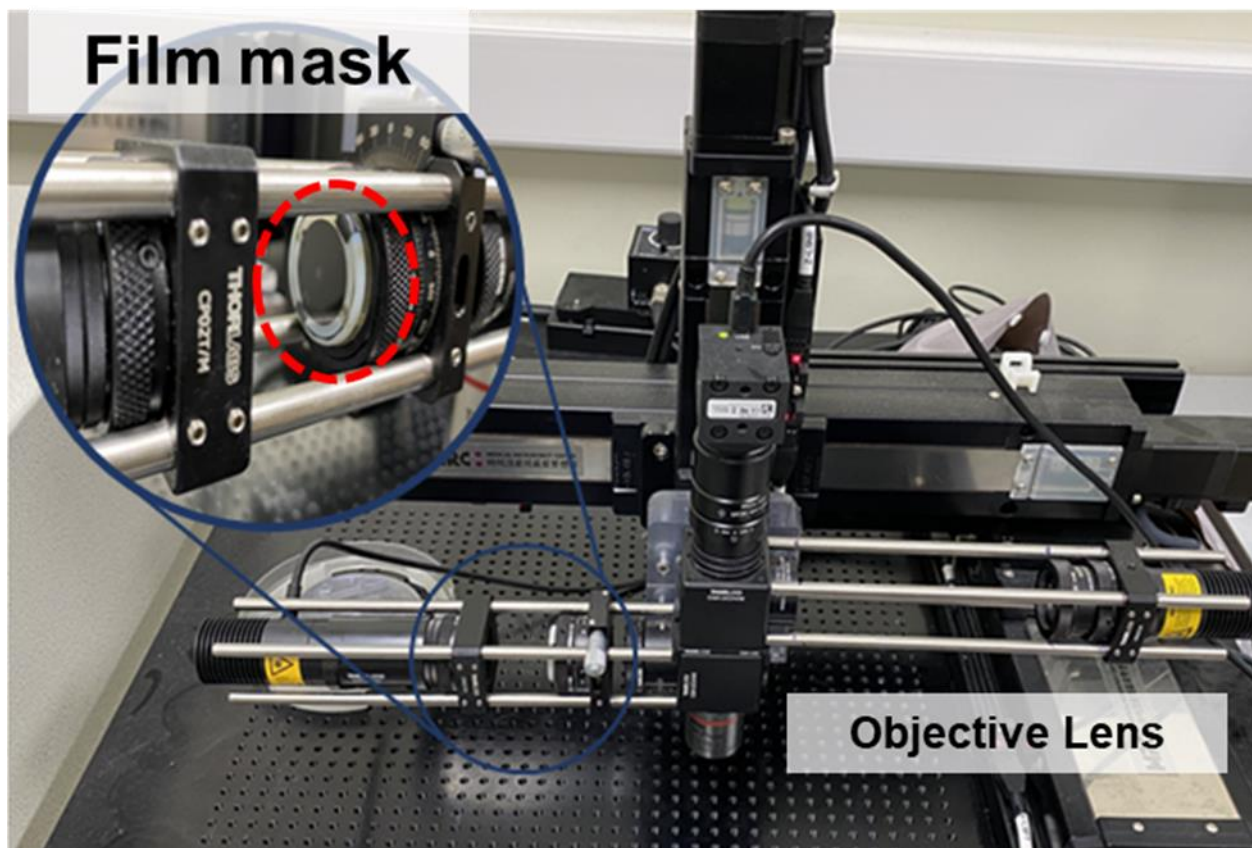

**Fig. S2.** The optical system used for microrobot fabrication.

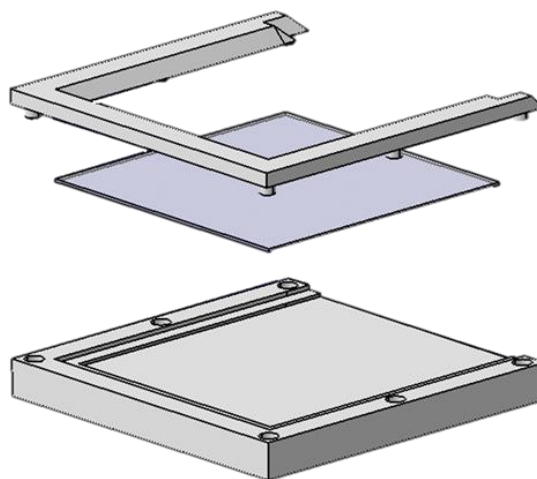

**Fig. S3.** Illustration of the chamber, which was fabricated using a three-dimensional printer

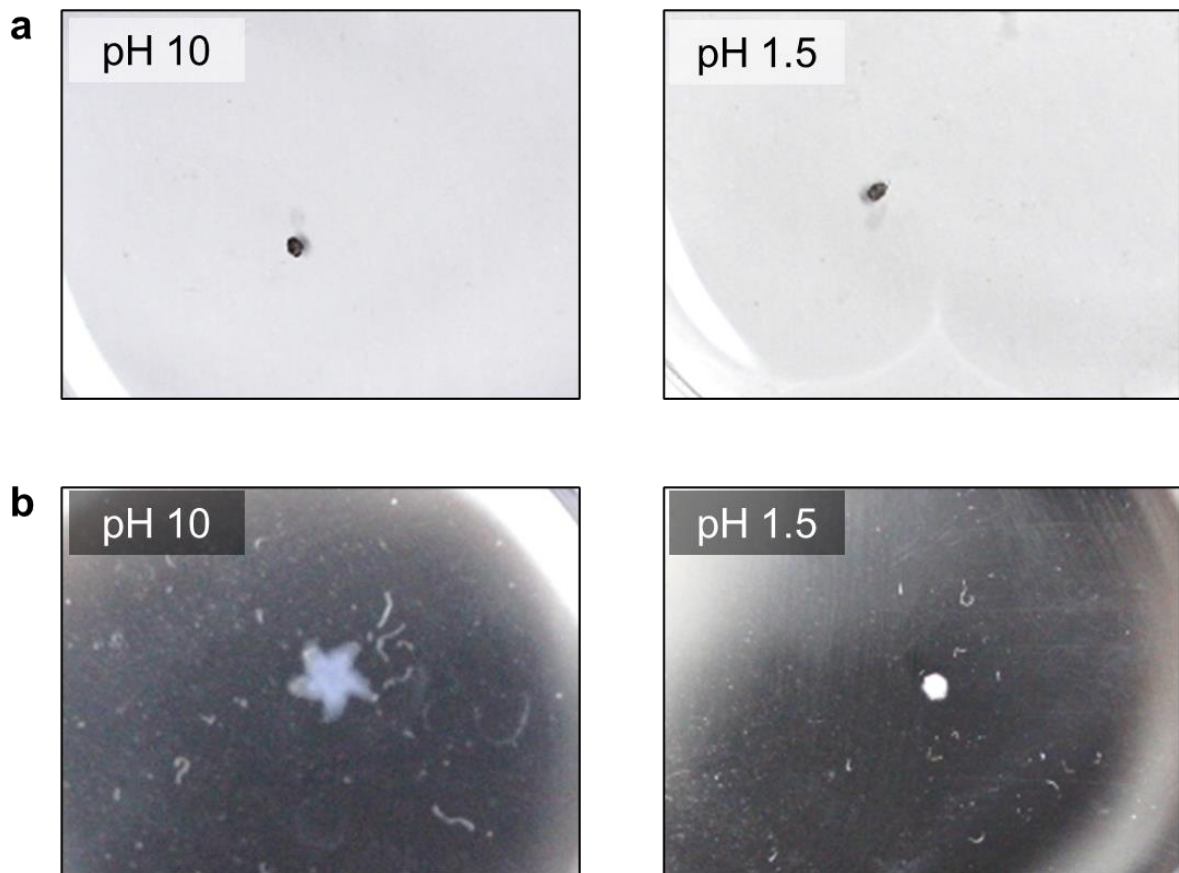

**Fig. S4.** Digital photographs of each material at different pH values (a) Composite resin (b) pHEMA.

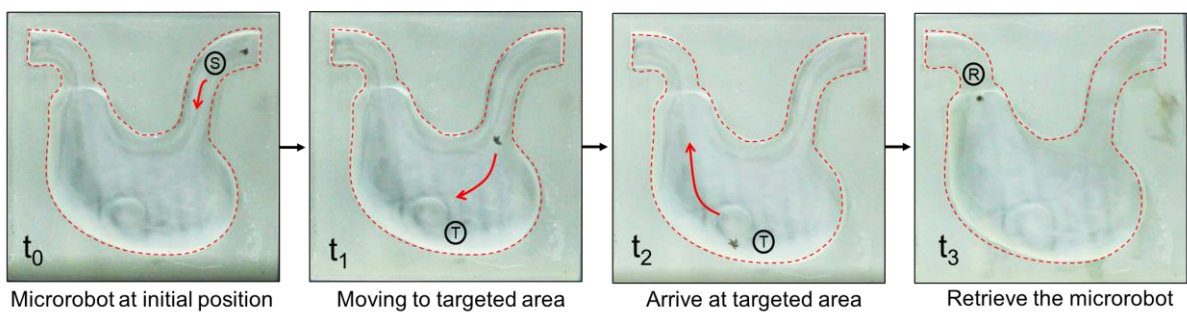

**Fig. S5.** Digital photographs of microrobot locomotion in a stomach-like channel.
